# Supplementary material for: Long-Term Predialysis Systolic Blood Pressure Variability and Intradialytic Cardiac Hemodynamics in Hemodialysis Patients
Source: Research Square preprint supplement (doi:10.21203/rs.3.rs-112584/v1), 2020-12-01
Supplement: Supplementary file 1 [file d2f87908e44c7c5c2e6e9061.docx]

**Long-term predialysis systolic blood pressure variability and intradialytic cardiac hemodynamics in hemodialysis patients**

Jingjuan Yang1,#, Jian Huang2,3,#, Biying Yu1, Qian Zhang4, Shanshan Zhang1, Longlong Wu1, Lin Luo1, Lizhu Li1, Li Li 1, Fei Han4, Christopher S. Wilcox 5, En Yin Lai 4,6,*, Yi Yang 1,4,*

1. Department of Nephrology, the Fourth Affiliated Hospital, Zhejiang University School of Medicine, Yiwu, China

2. Department of Nephrology, Central Hospital of Jinhua, Jinhua, China

3. Hemodialysis Quality Control Center of Jinhua, Jinhua, China

4. Kidney Disease Center, the First Affiliated Hospital, Zhejiang University School of Medicine, Hangzhou, China

5. Division of Nephrology and Hypertension, and Hypertension Center, Georgetown University, Washington, DC, USA

6. Department of Physiology, School of Basic Medical Sciences, Zhejiang University School of Medicine, Hangzhou, China

# Jingjuan Yangand Jian Huangare contributed equally to this work.

*Corresponding author to: Yi Yang, Department of Nephrology, the Fourth Affiliated Hospital, Zhejiang University School of Medicine, Yiwu, China, Tel: 86-571-87236992, Email: [yangyixk@zju.edu.cn](mailto:yangyixk@zju.edu.cn). And En Yin Lai as a co-corresponding author, Department of Physiology, School of Basic Medical Sciences, Zhejiang University School of Medicine, Hangzhou, China, Email: [laienyin@zju.edu.cn](mailto:laienyin@zju.edu.cn).

**Table S1. Association of** **Predialysis VIMSBP Analyzed as Tertiles and Intradialytic Cardiac Hemodynamic Instability**

| **Outcomes** | **Events** | **Crudea** | | **Fully Adjustedb** | |
| --- | --- | --- | --- | --- | --- |
| **HR (95% CI)** | **P Value** | **HR (95% CI)** | **P Value** |
| **IDH** | 283 |  |  |  |  |
| Lowest | 58 | Reference |  | Reference |  |
| Middle | 98 | 1.937  (1.345-2.789) | <0.001 | 1.846  (1.263-2.697) | 0.002 |
| Highest | 127 | 2.849  (1.998-4.064) | <0.001 | 2.566  (1.753-3.756) | <0.001 |
| **Great Change in RPP** | 535 |  |  |  |  |
| Lowest | 113 | Reference |  | Reference |  |
| Middle | 170 | 1.945  (1.434-2.637) | <0.001 | 1.772  (1.276-2.460) | 0.001 |
| Highest | 252 | 5.211  (3.786-7.171) | <0.001 | 4.408  (3.104-6.259) | <0.001 |

a Unadjusted model.

b Adjusted for demographic characteristics (age, sex), clinical factors (history of diabetes, hypertension, cardiocerebrovascular events, smoke, and BMI), dialysis-related factors (cause of ESRD, dialysis vintage, Kt/V, dry weight, and the ratio of excess weight at HD start to dry weight), laboratory measurements (serum albumin, calcium, phosphate, hemoglobin, and PTH), and use of antihypertensive medications.

IDH: intradialytic hypotension; RPP: rate-pressure product; CI: confidence interval.

**Table S2. Association of Predialysis VIMSBP with Intradialytic Cardiac Hemodynamic Instability after Stratification by predialysis SBP categories**

| **Outcomes** | **BP Range** | **Events** | **Crudea** | | **Fully Adjustedb** | |
| --- | --- | --- | --- | --- | --- | --- |
| **HR (95% CI)** | **P Value** | **HR (95% CI)** | **P Value** |
| **IDH** |  |  |  |  |  |  |
| T1 | <132 | 48 | 1.093  (1.018-1.172) | 0.014 | 1.120  (1.026-1.222) | 0.011 |
| T2 | 132-146 | 74 | 1.125  (1.051-1.205) | 0.001 | 1.144  (1.054-1.242) | 0.001 |
| T3 | >146 | 161 | 1.133  (1.067-1.204) | <0.001 | 1.135  (1.061-1.214) | <0.001 |
| **Great Change in RPP** |  |  |  |  |  |  |
| T1 | <132 | 169 | 1.265  (1.187-1.349) | <0.001 | 1.237  (1.151-1.330) | <0.001 |
| T2 | 132-146 | 165 | 1.206  (1.128-1.290) | <0.001 | 1.216  (1.123-1.317) | <0.001 |
| T3 | >146 | 201 | 1.234  (1.152-1.322) | <0.001 | 1.238  (1.144-1.340) | <0.001 |

HR per 1 SD increase in the predialysis VIMSBP. T1 to T3 refers to categories of SBP at baseline (Tertiles of SBP)

a Unadjusted model.

b Adjusted for demographic characteristics (age, sex), clinical factors (history of diabetes, hypertension, cardiocerebrovascular events, smoke, and BMI), dialysis-related factors (cause of ESRD, dialysis vintage, Kt/V, dry weight, and the ratio of excess weight at HD start to dry weight), laboratory measurements (serum albumin, calcium, phosphate, hemoglobin, and PTH), and use of antihypertensive medications.

IDH: intradialytic hypotension; RPP: rate-pressure product; CI: confidence interval.

**Table S3. Association of Predialysis VIMDBP and Intradialytic Cardiac Hemodynamic Instability**

| **Outcomes** | **Events** | **Crudea** | | **Fully Adjustedb** | |
| --- | --- | --- | --- | --- | --- |
| **HR (95% CI)** | **P Value** | **HR (95% CI)** | **P Value** |
| **IDH** | 283 | 1.129  (1.060-1.201) | <0.001 | 1.100  (1.029-1.176) | 0.005 |
| **Great Change in RPP** | 535 | 1.157  (1.091-1.227) | <0.001 | 1.154  (1.081-1.232) | <0.001 |

a Unadjusted model.

b Adjusted for demographic characteristics (age, sex), clinical factors (history of diabetes, hypertension, cardiocerebrovascular events, smoke, and BMI), dialysis-related factors (cause of ESRD, dialysis vintage, Kt/V, dry weight, and the ratio of excess weight at HD start to dry weight), laboratory measurements (serum albumin, calcium, phosphate, hemoglobin, and PTH), and use of antihypertensive medications.

IDH: intradialytic hypotension; RPP: rate-pressure product; CI: confidence interval.
